# Supplementary material for: STK39 enhances the progression of Cholangiocarcinoma via PI3K/AKT pathway
Source: PubMed Central journal article supplement — iScience. 2021 Oct 6;24(11):103223. doi: 10.1016/j.isci.2021.103223 (PMC8551078; doi:10.1016/j.isci.2021.103223), 2021-10-06
Supplement: mmc1.pdf [file mmc1.pdf]

**iScience, Volume 24**

**Supplemental information**

**STK39 enhances the progression  
of Cholangiocarcinoma via PI3K/AKT pathway**

**Xiaopei Hao, Yao Zhang, Yiwei Lu, Guoyong Han, Dawei Rong, Guoqiang Sun, Guangshun Sun, Weiwei Tang, Jindao Wu, and Xuehao Wang**

## Supplementary information

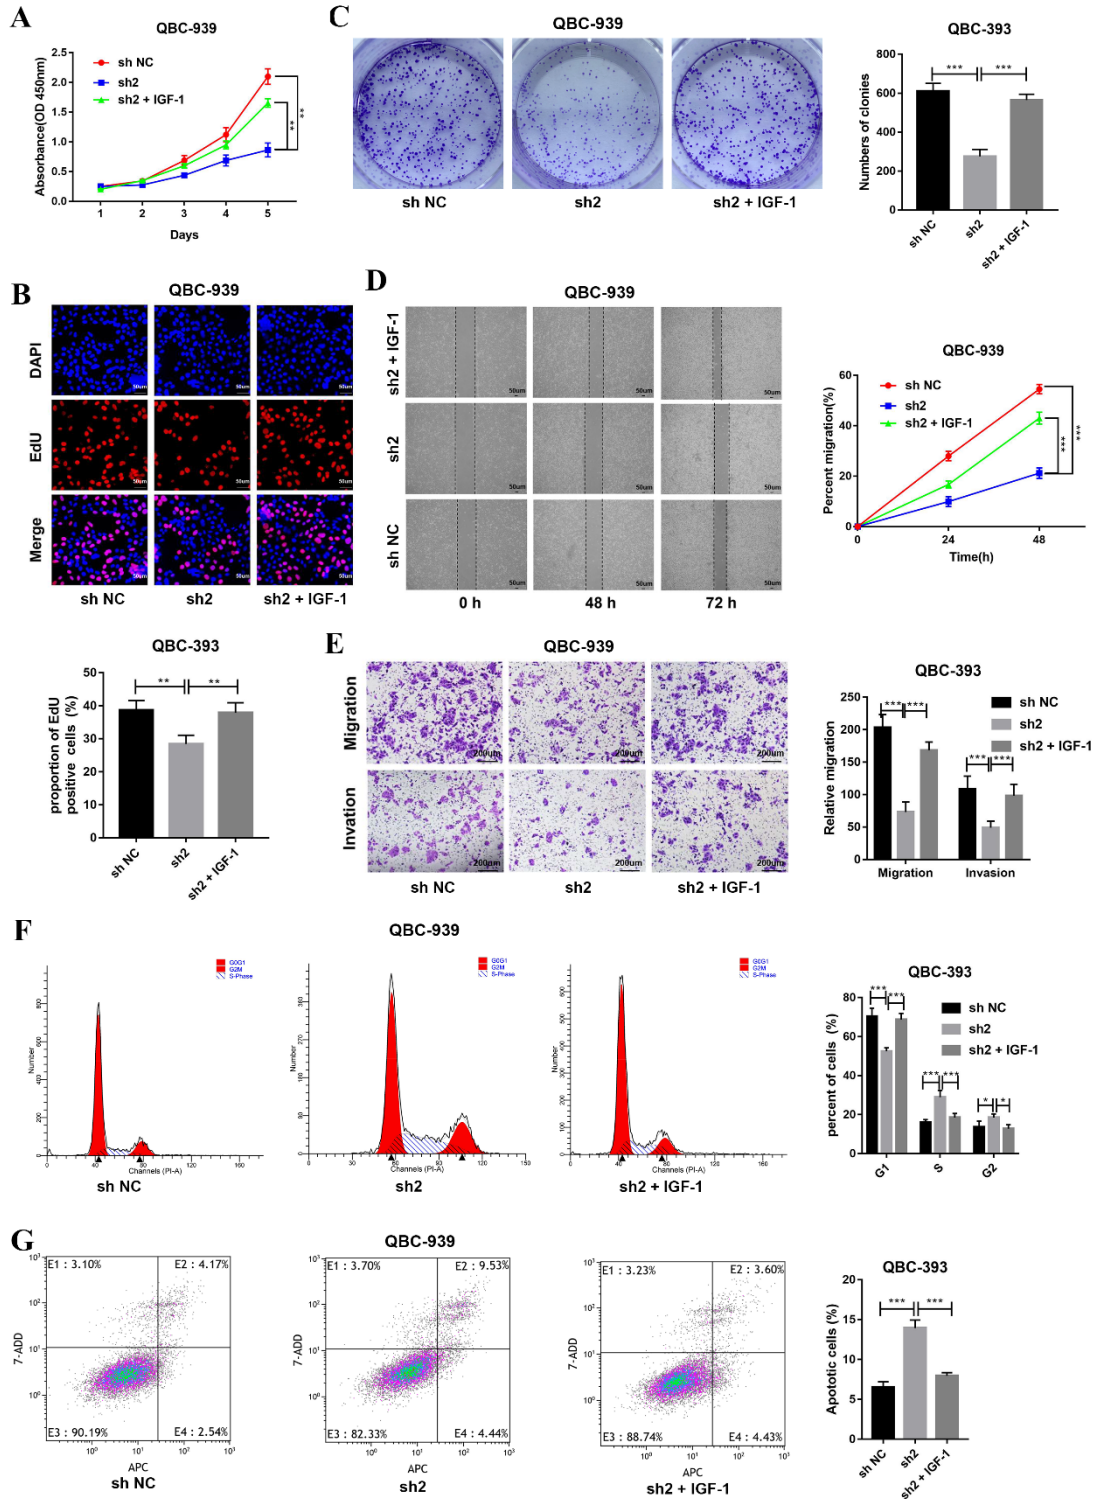

**Figure S1.** The positive effect of STK39 on tumor progression was rescued by the application of IGF-1. Related to Figure 6.

QBC-939 cells were transfected with STK39 shRNA (sh2) or control shRNA (sh NC), and STK39-sh2 cells were treated with or without indicated concentrations of IGF-1; The (A) CCK 8 assay (measured at 0, 24, 48, 72, and 96 h), (B) EdU, (C) colony formation, (D) wound healing assay, (E) transwell assay, (F) Cell cycle, and (G) apoptotic analysis were performed in the three groups. Scale bar: (B, D) are 50 $\mu$ m and (E) is 200 $\mu$ m. Data were shown as mean  $\pm$  SEM.

**Table S1: shRNA used in this study (Related to STAR METHODS)**

| <b>Genes</b> | <b>Sequence (5'-3')</b> |
|--------------|-------------------------|
| shSTK39-1    | GTCAGATTCACAGGGATTT     |
| shSTK39-2    | AGGCAATAATAGCAACAAT     |
| shSTK39-3    | ACGGCAAGTCCTTTAGAAA     |
| sh NC        | TTCTCCGAACGTGTCACGT     |

**Table S2: Primer sequences used in this study (Related to STAR METHODS)**

| <b>Genes</b>   |         | <b>Sequence (5'-3')</b>       |
|----------------|---------|-------------------------------|
| STK39          | Forward | TGCCAGACCAGTATGGATGAA         |
|                | Reverse | GGTGTAAATAGGTCACACTACGTTGG    |
| $\beta$ -actin | Forward | ATTGCCGACAGGATGCAGAA          |
|                | Reverse | GCTGATCCACATCTGCTGGAA         |
| miR-26a-5p     | Forward | ATGGTTCGTGGGTTCAAGTAATCGATGGC |
|                | Reverse | GCAGGGTCCGAGTATTCG            |
